# Supplementary material for: phyB and HY5 are Involved in the Blue Light-Mediated Alleviation of Dormancy of Arabidopsis Seeds Possibly via the Modulation of Expression of Genes Related to Light, GA, and ABA
Source: PubMed Central journal article supplement (PMC6928806; doi:10.3390/ijms20235882), 2019-11-23

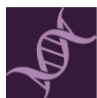

Supplementary Materials: Supplementary materials can be found at [www.mdpi.com/xxx/s1](http://www.mdpi.com/xxx/s1).

## phyB and HY5 are Involved in the Blue Light-Mediated Alleviation of Dormancy of *Arabidopsis* Seeds Possibly via the Modulation of Expression of Genes Related to Light, GA, and ABA

Marlena Stawska and Krystyna Oracz \*

<sup>1</sup> Department of Plant Physiology, Institute of Biology, Warsaw University of Life Sciences – SGGW, Nowoursynowska str. 159, 02-776, Warsaw, Poland; [krystyna\\_oracz@sggw.pl](mailto:krystyna_oracz@sggw.pl)

\* Correspondence: [krystyna\\_oracz@sggw.pl](mailto:krystyna_oracz@sggw.pl); Tel.: (+48 22 59 325 35) (K.O.)

**Supplementary Table S1.** Effect of different combinations of pre- or post-incubations in darkness on BL light effect on germination rates of WT dormant *Arabidopsis* Col-0 seeds. Results are expressed as % of germinated seeds after 48 and 72 h of incubation in specific light conditions  $\pm$  SD. Experiments were conducted in three biological and two technical replicates (100 seeds per each replicate).

| Light conditions of incubation             | Germination (%) of WT dormant seeds after time of incubation: |                   |
|--------------------------------------------|---------------------------------------------------------------|-------------------|
|                                            | 48 h                                                          | 72 h              |
| 3 h BL > Darkness (const.)                 | 3.0 $\pm$ 1.0 **                                              | 9.0 $\pm$ 1.0 **  |
| 6 h BL > Darkness (const.)                 | 5.6 $\pm$ 0.5 **                                              | 12.0 $\pm$ 1.5 ** |
| 24 h BL > Darkness (const.)                | 26.5 $\pm$ 0.5 **                                             | 54.0 $\pm$ 2.0    |
| 48 h BL > Darkness (const.)                | 19.5 $\pm$ 2.5 *                                              | 50.6 $\pm$ 2.5    |
| 6 h Darkness > 3 h BL > Darkness (const.)  | 25.5 $\pm$ 1.0 *                                              | 46.6 $\pm$ 0.5    |
| 24 h Darkness > 3 h BL > Darkness (const.) | 11.0 $\pm$ 0.5                                                | 27.0 $\pm$ 0.5 ** |
| BL (const.)                                | 14.3 $\pm$ 0.5                                                | 44.4 $\pm$ 2.5    |
| Darkness (const.)                          | 0.70 $\pm$ 0.5 **                                             | 0.7 $\pm$ 0.5 **  |

Supplementary Figure S1.

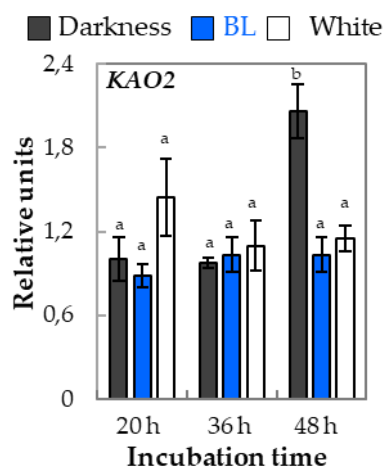

**Supplementary Figure S1.** The relative expression of *KAO2* gene in samples isolated from WT dormant *Arabidopsis* (Col-0) seeds incubated on water for 20, 36 and 48 h, in different light conditions: darkness, BL and white light, at temp. 25 °C. The transcripts level was normalized to reference genes (*ACT7*, *APC2*, *HBT*) and to the internal control which was the expression value of *KAO2* gene obtained in darkness, after 20 h of incubation. Three biological and two technical replicates were performed. The bars show the relative units  $\pm$  SD.

37  
38  
39  
40  
41  
42  
43  
44  
45  
46  
47  
48  
49  
50  
51  
52  
53  
54  
55  
56  
57  
58  
59  
60  
61  
62  
63  
64  
65  
66  
67  
68  
69  
70  
71  
72  
73  
74  
75  
76  
77  
78  
79  
80

81 **Supplementary Figure S2.**

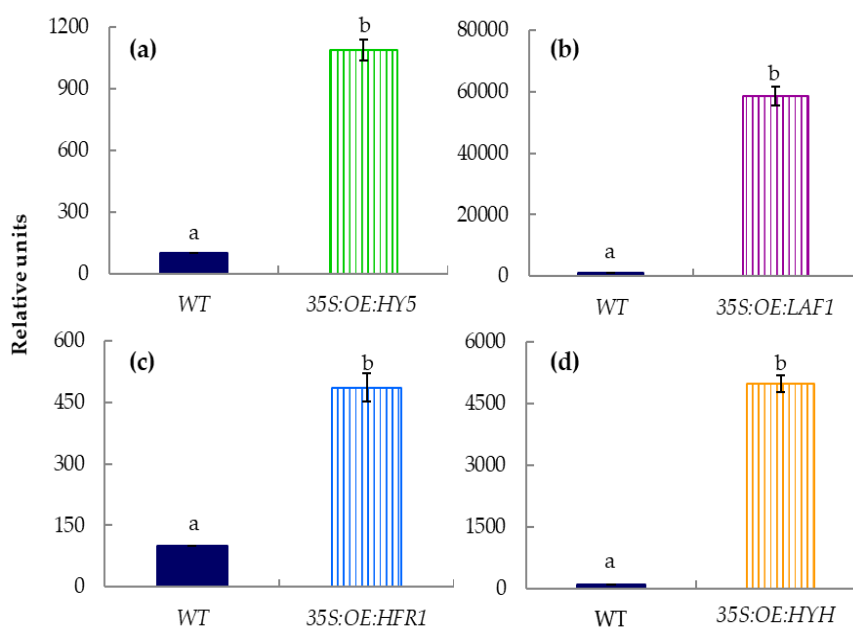

**Supplementary Figure 2.** The qRT-PCR analysis of relative expression of defined genes in 3 weeks old seedlings of overexpression lines of *Arabidopsis* transformants.

82  
83  
84  
85  
86  
87  
88  
89  
90  
91  
92

**Supplementary Figure S3.**

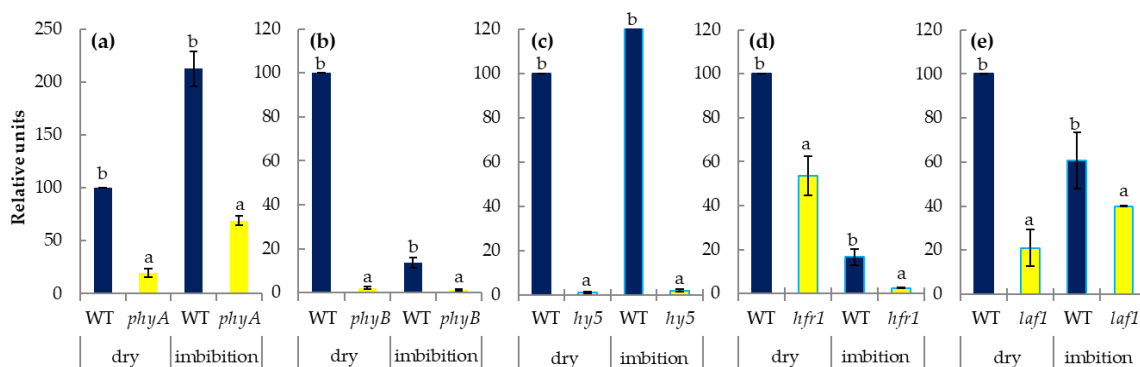

**Supplementary Figure 3.** The qRT-PCR analysis of relative expression of defined genes in dormant seeds (dry and imbibed for 6 h on light) of *Arabidopsis* T-DNA insertion mutants.

93  
94  
95  
96  
97  
98  
99  
100  
101  
102  
103  
104  
105

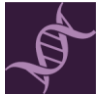

Supplementary Table S2. Characteristic of primers used in qRT-PCR analysis of genes relative expression

| Gene                                 | Full gene name                                | Gene accession no. | NCBI number | L/R | Sequence 5' --> 3'    | Tm °C | Product size [bp] |
|--------------------------------------|-----------------------------------------------|--------------------|-------------|-----|-----------------------|-------|-------------------|
| <b>Reference genes</b>               |                                               |                    |             |     |                       |       |                   |
| <i>ACT7</i>                          | <i>Actin 7</i>                                | <b>At5g09810</b>   | NM_121018.3 | L   | GGAGCTGAGAGATTCCGTTG  | 58.1  | 197               |
|                                      |                                               |                    |             | R   | TCTTTGCTCATACGGTCAGC  | 57.9  |                   |
| <i>APC2</i>                          | <i>Anaphase-Promoting Complex/Cyclosome 2</i> | <b>At2g04660</b>   | NM_126495.2 | L   | GGAGGAGTTAAGCGCAATCA  | 57.9  | 154               |
|                                      |                                               |                    |             | R   | CACCAACTTGTCATGTCCCA  | 58.0  |                   |
| <i>HBT</i>                           | <i>Hobbit</i>                                 | <b>At2g20000</b>   | NM_179663.2 | L   | ATCGATGAGAGCCCCTGAAA  | 59.2  | 181               |
|                                      |                                               |                    |             | R   | GGCTCTTGTGGCTGTGTTAC  | 58.1  |                   |
| <b>Light signaling related genes</b> |                                               |                    |             |     |                       |       |                   |
| <i>PHYA</i>                          | <i>Phytochrome A</i>                          | <b>At1g09570</b>   | NM_100828.3 | L   | CAAGGTCCGGATGATAGTTG  | 51.8  | 175               |
|                                      |                                               |                    |             | R   | AACTACAACCGCCATAACCA  | 49.7  |                   |
| <i>PHYB</i>                          | <i>Phytochrome B</i>                          | <b>At2g18790</b>   | NM_127435.3 | L   | AAAGAATCTGAGGCGGCTAT  | 49.7  | 199               |
|                                      |                                               |                    |             | R   | CTGCAATCTTAGCGTTCCAT  | 49.7  |                   |
| <i>CRY1</i>                          | <i>Cryptochrome 1</i>                         | <b>At4g08920</b>   | NM_116961.4 | L   | CAGCAGCGGAAGGAGAGAAA  | 60.0  | 232               |
|                                      |                                               |                    |             | R   | TTTCACCCGGAGTTACAGCCC | 59.9  |                   |
| <i>CRY2</i>                          | <i>Cryptochrome 2</i>                         | <b>At1g04400</b>   | NM_100320.3 | L   | TTCGGGAAATAAGCGTCAG   | 57.9  | 221               |
|                                      |                                               |                    |             | R   | TCAACATCAGCATCCCAAGG  | 57.9  |                   |
| <i>CRY3</i>                          | <i>Cryptochrome 3</i>                         | <b>At5g24850</b>   | NM_122394.3 | L   | GGAGAGATGCCAAGACAGGG  | 59.8  | 269               |
|                                      |                                               |                    |             | R   | TTGTGCTTGCTTGGGAATGC  | 59.9  |                   |
| <i>HY5</i>                           | <i>Elongated Hypocotyl 5</i>                  | <b>At5g11260</b>   | NM_121164.4 | L   | CGGAGAAAGAGAACAAGCGG  | 58.9  | 226               |
|                                      |                                               |                    |             | R   | CCACCACCTCCTCTCTTGTT  | 58.9  |                   |
| <i>HFR1</i>                          | <i>Long Hypocotyl in Far-Red</i>              | <b>At1g02340</b>   | NM_100115.3 | L   | CTAAATCCGGCGAATCACAT  | 49.7  | 164               |
|                                      |                                               |                    |             | R   | GGAACCAAACCGTGAAGAGA  | 51.8  |                   |

|                                                        |                                                                |                  |              |   |                       |      |     |
|--------------------------------------------------------|----------------------------------------------------------------|------------------|--------------|---|-----------------------|------|-----|
| <b>HYH</b>                                             | <i>HY5-Homolog</i>                                             | <b>At3g17609</b> | NM_180274.2  | L | CACAAGAAGCACAAAAGTGGG | 53.0 | 233 |
|                                                        |                                                                |                  |              | R | TGCGCTGATACTCTGTTCT   | 51.8 |     |
| <b>LAF1</b>                                            | <i>Long After Far-Red Light 1</i>                              | <b>At4g25560</b> | NM_118688.3  | L | CCCCTCCTTCGTCTTCATCA  | 58.8 | 181 |
|                                                        |                                                                |                  |              | R | AGCCTTGGAAATCTCAGGAGC | 59.4 |     |
| <b>CIB1</b>                                            | <i>Cryptochrome Interacting Basic Helix-Loop-Helix 1</i>       | <b>At4g34530</b> | NM_119618.3  | L | CACAGCATAGCAGAACGAGT  | 58.0 | 191 |
|                                                        |                                                                |                  |              | R | GGCCTTGGATTACAATTGC   | 57.9 |     |
| <b>CIB5</b>                                            | <i>Cryptochrome Interacting Basic Helix-Loop-Helix 5</i>       | <b>At1g26260</b> | NM_202184.2  | L | TCGATGAAACTTTCGGCTGT  | 57.8 | 171 |
|                                                        |                                                                |                  |              | R | TGAGGAAATGTTTCGGTTGCA | 58.0 |     |
| <b>SUB1</b>                                            | <i>Calcium Ion Binding Protein SUB1</i>                        | <b>At4g08810</b> | NM_116951.1  | L | GAAGGGCAAGCATCGAAGTA  | 57.9 | 230 |
|                                                        |                                                                |                  |              | R | CTCCACACCTGAACCAATCC  | 58.1 |     |
| <b>PP7</b>                                             | <i>Serine/Threonine Phosphatase 7</i>                          | <b>At5g63870</b> | NM_125782.3  | L | CTGGTCTTGGTGGAAATGGAC | 58.1 | 171 |
|                                                        |                                                                |                  |              | R | GAGGATCCGAGAAATCAGGC  | 57.8 |     |
| <b>PHR2</b>                                            | <i>Photolyase/Blue Light Receptor 2</i>                        | <b>At2g47590</b> | NM_130327.3  | L | ATCGCAGCGCTTGATCAATT  | 58.9 | 226 |
|                                                        |                                                                |                  |              | R | CTGGTTCCCTTGCTCAACC   | 59.0 |     |
| <b>COP1</b>                                            | <i>Constitutive Photomorphogenic 1</i>                         | <b>At2g32950</b> | NM_128855.3  | L | TCTCACAGTGAACAGCGAGT  | 58.9 | 199 |
|                                                        |                                                                |                  |              | R | ATTCGCAGTCAACATCGTGG  | 58.9 |     |
| <b>Genes involved in ABA metabolism and signalling</b> |                                                                |                  |              |   |                       |      |     |
| <b>ABA1</b>                                            | <i>ABA Deficient 1</i>                                         | <b>At5g67030</b> | NM_126103.2  | L | TGGCTGCAATTATGGCTTCC  | 51.8 | 217 |
|                                                        |                                                                |                  |              | R | TCGGCTTTGTGAGTGTCT    | 51.8 |     |
| <b>NCED6</b>                                           | <i>Nine-Cis-Epoxy-carotenoid Dioxygenase 6</i>                 | <b>At3g24220</b> | NM_113327.2  | L | AATGCGTGGGAAGAGAGAAC  | 57.9 | 205 |
|                                                        |                                                                |                  |              | R | GGTTTATGTGACCCGCTTCT  | 57.9 |     |
| <b>NCED9</b>                                           | <i>Nine-Cis-Epoxy-carotenoid Dioxygenase 9</i>                 | <b>At1g78390</b> | NM_106486.2  | L | CAATGATAGCCCACCCGAAA  | 57.9 | 239 |
|                                                        |                                                                |                  |              | R | ACCTCTTATCATCTCCGGCA  | 57.9 |     |
| <b>CYP707A2</b>                                        | <i>Cytochrome P450, Family 707, Subfamily A, Polypeptide 2</i> | <b>At2g29090</b> | NM_001202700 | L | GCAGCAAGTGTACTGTCCTT  | 58.1 | 232 |
|                                                        |                                                                |                  |              | R | GCTCACTTCTGGACATGAG   | 57.9 |     |
| <b>ABI3</b>                                            | <i>ABA Insensitive 3</i>                                       | <b>At3G24650</b> | NM_113376.3  | L | CATCTCCAGTCTCTGTCAAC  | 57.9 | 168 |

|                                                      |                                       |                  |                |   |                      |      |     |
|------------------------------------------------------|---------------------------------------|------------------|----------------|---|----------------------|------|-----|
|                                                      |                                       |                  |                | R | CACCAGAAGAGTCGTCACAG | 57.9 |     |
| <b>ABI4</b>                                          | <i>ABA Insensitive 4</i>              | <b>At2G40220</b> | NM_129580.1    | L | GTTAGGGCAGGAACAAGGAG | 57.8 | 155 |
|                                                      |                                       |                  |                | R | TATAACCCGGATCCAGACCC | 57.9 |     |
| <b>ABI5</b>                                          | <i>ABA Insensitive 5</i>              | <b>At2G36270</b> | NM_129185.3    | L | ATGATCAAGAACCGCGAGTC | 58.1 | 221 |
|                                                      |                                       |                  |                | R | ATCAATGTCCGCAATCTCCC | 58.0 |     |
| <b>HAI1</b>                                          | <i>Highly ABA Induced PP2C Gene 1</i> | <b>At5g59220</b> | NM_125312.3    | L | GTCACGAGCCATTGGAGATA | 57.1 | 164 |
|                                                      |                                       |                  |                | R | AACACATTCGAACGACGCTA | 57.9 |     |
| <b>HAI2</b>                                          | <i>Highly ABA Induced PP2C Gene 2</i> | <b>At1g07430</b> | NM_100617.2    | L | ATGTCACGAGCCATAGGAGA | 57.9 | 236 |
|                                                      |                                       |                  |                | R | TCTTCTTCACTCCTCCTCCC | 57.7 |     |
| <b>HAI3</b>                                          | <i>Highly ABA Induced PP2C Gene 3</i> | <b>At2g29380</b> | NM_128492.2    | L | CCGAGATTCCAAACGGTGAT | 51.8 | 181 |
|                                                      |                                       |                  |                | R | CTCTTCTTCTACCGCACACC | 53.8 |     |
| <b>Genes involved in GA metabolism and signaling</b> |                                       |                  |                |   |                      |      |     |
| <b>GA3ox1</b>                                        | <i>Gibberellin 3-Oxidase 1</i>        | <b>At1g15550</b> | NM_101424.2    | L | CTTGGGGTGCCTTCCAAATC | 59.1 | 195 |
|                                                      |                                       |                  |                | R | AACCTTCGGACCACATTTGC | 59.0 |     |
| <b>GA3ox2</b>                                        | <i>Gibberellin 3-Oxidase 2</i>        | <b>At1g80340</b> | NM_106683.1    | L | CCAAGTTGATGTGGTTCGCA | 59.0 | 176 |
|                                                      |                                       |                  |                | R | GAGGGTCGAGTCTGTATGGG | 58.9 |     |
| <b>GA2ox6</b>                                        | <i>Gibberellin 2-Oxidase 6</i>        | <b>At1g02400</b> | NM_100121.4    | L | AGCGAAGTGAGTGAGCTGAT | 59.1 | 215 |
|                                                      |                                       |                  |                | R | GGGTCAGATGGGATTGGGAT | 58.8 |     |
| <b>GA2ox2</b>                                        | <i>Gibberellin 2-Oxidase 2</i>        | <b>At1g30040</b> | NM_001036035.1 | L | ATCCCCACATACAAACCGGT | 59.0 | 193 |
|                                                      |                                       |                  |                | R | GCAAGCCGAAGAAGCCAATA | 58.9 |     |
| <b>GID1a</b>                                         | <i>GA Insensitive Dwarf1A</i>         | <b>At3g05120</b> | NM_111384.3    | L | TACTCTTTGTCGCAGGCTTG | 51.8 | 239 |
|                                                      |                                       |                  |                | R | CCGATTCACCCGCTCTTAAA | 51.8 |     |
| <b>GID1b</b>                                         | <i>GA Insensitive Dwarf1B</i>         | <b>At3g63010</b> | NM_116166.4    | L | CCTCGAGCTAACCAAACCTC | 53.8 | 151 |
|                                                      |                                       |                  |                | R | GACAACAACAACCCGCAAA  | 49.7 |     |
| <b>GID1c</b>                                         | <i>GA Insensitive Dwarf1C</i>         | <b>At5g27320</b> | NM_122614.3    | L | TGTGCATAATGTGCGGTAA  | 49.7 | 193 |
|                                                      |                                       |                  |                | R | ATGCTCTGTCTTCACCCT   | 51.8 |     |

|               |                                                          |                  |              |          |                       |      |     |
|---------------|----------------------------------------------------------|------------------|--------------|----------|-----------------------|------|-----|
| <b>RGL1</b>   | <i>RGA-Like 1</i>                                        | <b>At1g66350</b> | NM_105306.3  | <b>L</b> | AAGCATGCTCTCGGATCTTG  | 51.8 | 163 |
|               |                                                          |                  |              | <b>R</b> | AGAGCGCGTAGAGGATAACT  | 51.8 |     |
| <b>RGL2</b>   | <i>RGA-Like 2</i>                                        | <b>At3g03450</b> | NM_111216.2  | <b>L</b> | ACCGGAGTTAGACTTGTCCA  | 51.8 | 176 |
|               |                                                          |                  |              | <b>R</b> | CGGTAAATACGACGAGCCAA  | 51.8 |     |
| <b>RGL3</b>   | <i>RGA-Like 3</i>                                        | <b>At5g17490</b> | NM_121755.2  | <b>L</b> | ACTTACACTCTCCAGGTCCC  | 53.8 | 239 |
|               |                                                          |                  |              | <b>R</b> | GTTATCGTCTCCACCACCAC  | 53.8 |     |
| <b>XERICO</b> | <i>RING/U-box superfamily protein</i>                    | <b>At2g04240</b> | NM_201687.1  | <b>L</b> | GCAAGAACAGGCAGACAA    | 48.9 | 172 |
|               |                                                          |                  |              | <b>R</b> | GGCACAACAACAAGAGGAG   | 51.1 |     |
| <b>KAO2</b>   | <i>Arabidopsis thaliana Ent-kaurenoic acid oxidase 2</i> | <b>At2g32440</b> | NM_001202728 | <b>L</b> | CAGGGAAGCAAAGAGTGATG  | 58.4 | 181 |
|               |                                                          |                  |              | <b>R</b> | CAAACCAAAAAGGAAGGAATG | 57.1 |     |

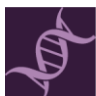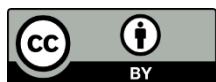

Supplement: ijms-20-05882-s001.pdf [file ijms-20-05882-s001.pdf]
